# Supplementary material for: Chromatin remodelers HELLS, WDHD1 and BAZ1A are dynamically expressed during mouse spermatogenesis
Source: PubMed Central journal article supplement (PMC9782464; doi:10.1530/rep-22-0240), 2022-10-04

Figure S1

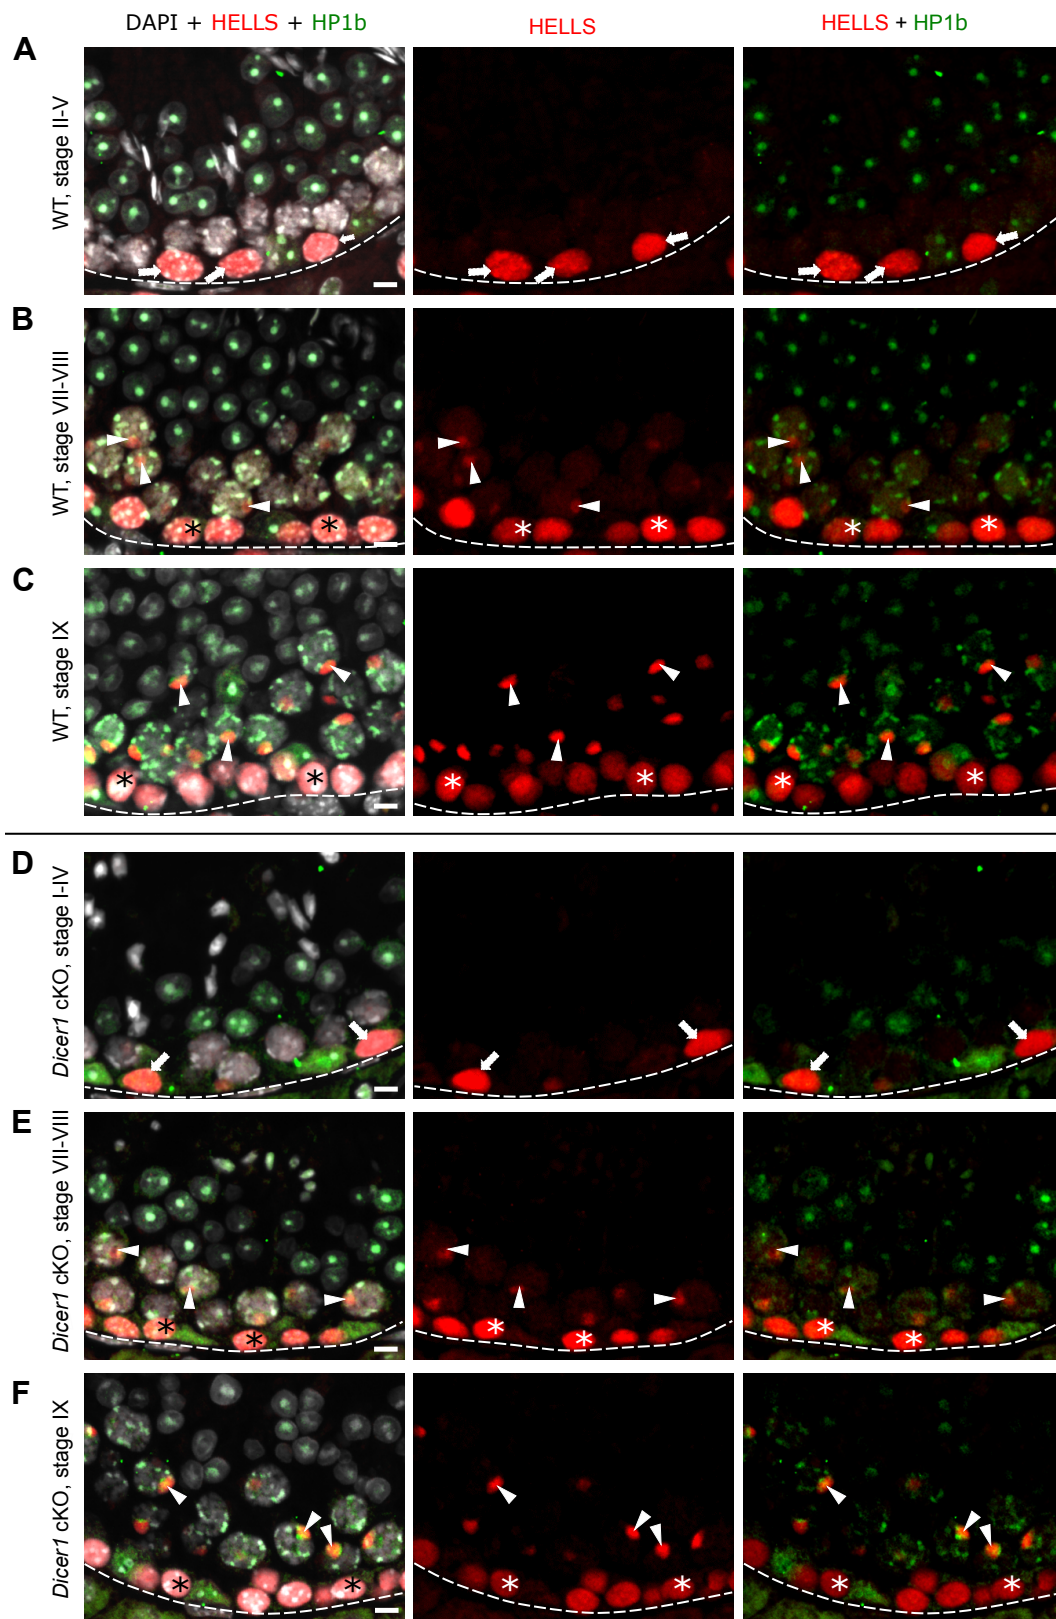

Supplement: supplementary_figure_1.pdf [file supplementary_figure_1.pdf]
